# Supplementary material for: Rapid endophytic bacterial detection by enzyme incorporated MALDI MS
Source: Royal Society of Chemistry journal article supplement (doi:10.1039/c4ra05604c), 2014-01-01
Supplement: c4ra05604c1.pdf [file c4ra05604c1.pdf]

# Fig S1

**a**

**b**

# Fig S2

Root

Nodule

Roots

Root Nodules

Crushed in PBS

Lysozyme treatment

MALDI Analysis

Endophytic bacterial identification  
by Biotyper

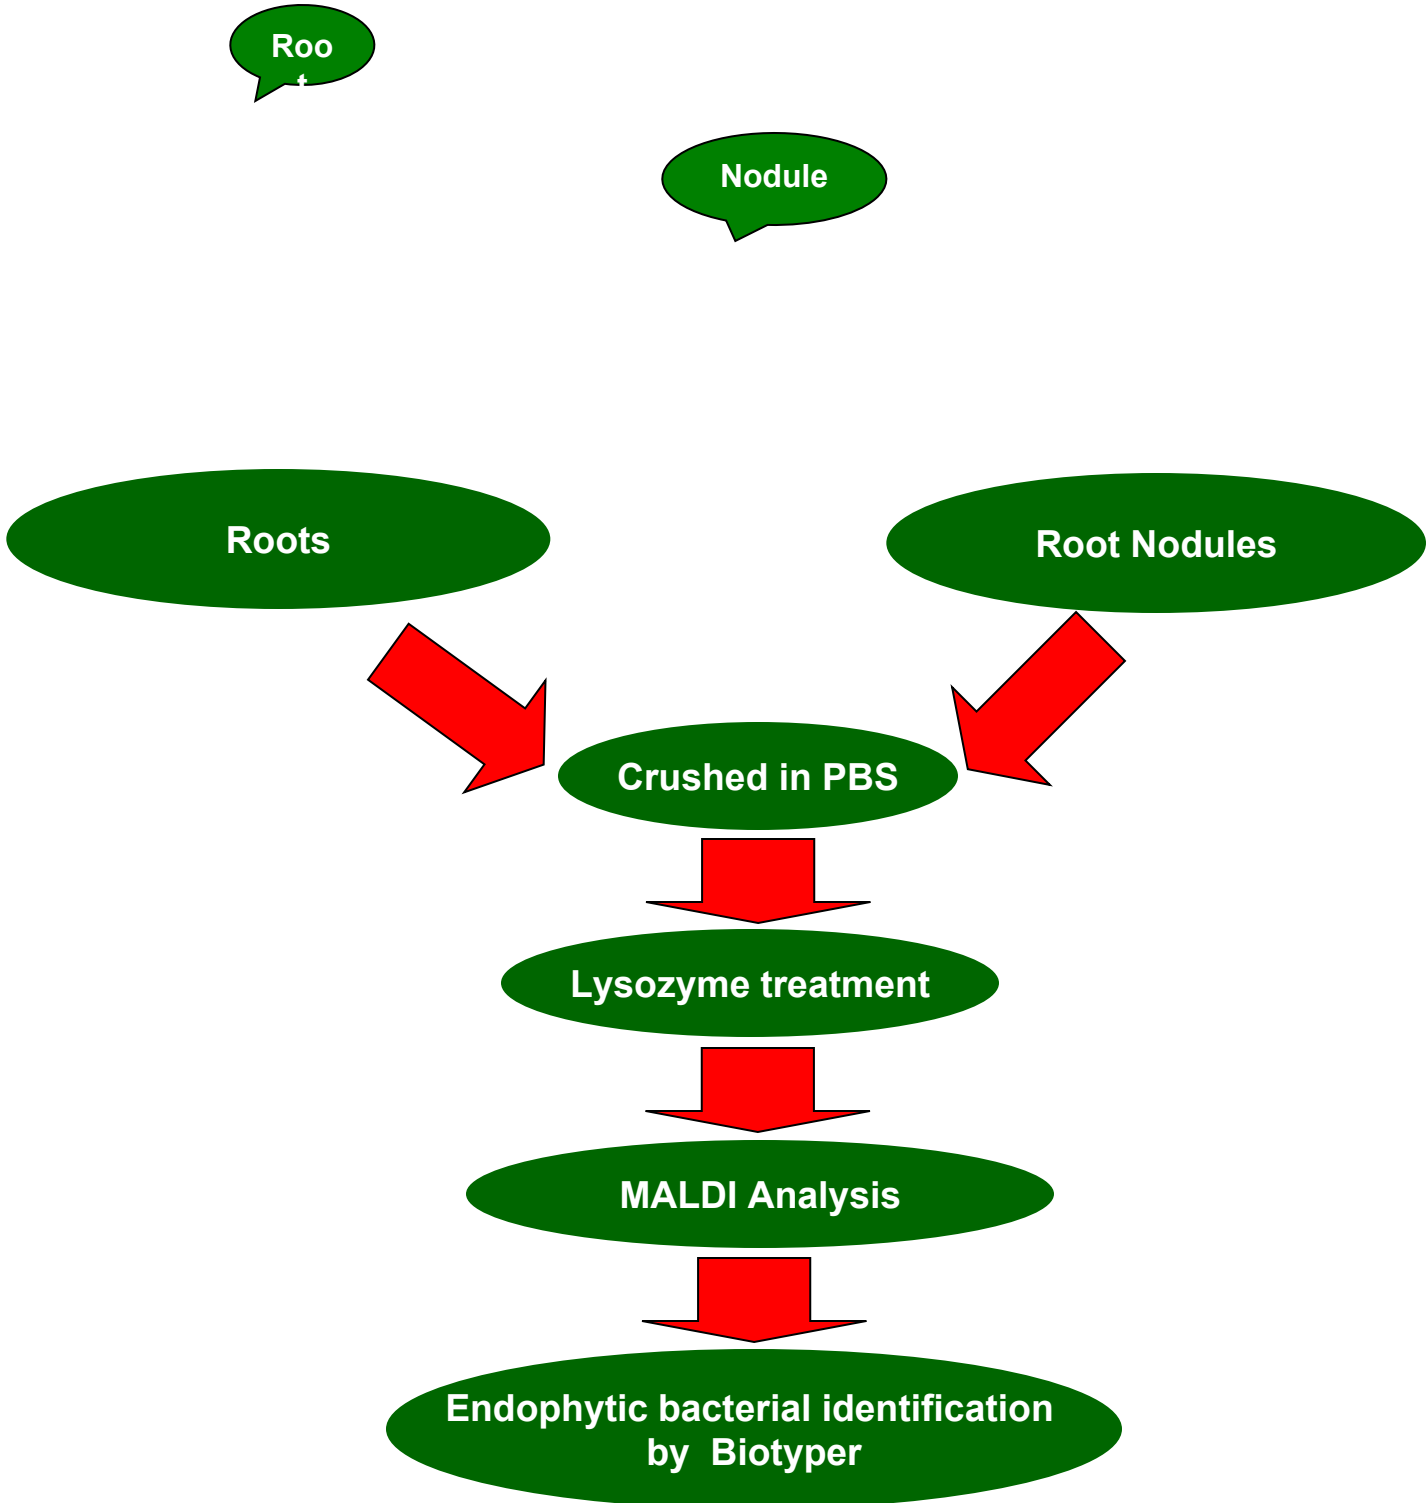

# Fig S3

**a**

Fig S4
