# Supplementary material for: Rapid endophytic bacterial detection by enzyme incorporated MALDI MS
Source: Royal Society of Chemistry journal article supplement (doi:10.1039/c4ra05604c), 2014-01-01
Supplement: c4ra05604c2.pdf [file c4ra05604c2.pdf]

**Table S1**

| <b>Organism resemblance</b>                    | <b>Act Sc</b> | <b>Max Sc</b> | <b>Rel Score</b> | <b>PN k</b> | <b>PN b</b> | <b>PN m</b> | <b>Rel P-Num</b> | <b>I-Cor</b> | <b>Score</b> |
|------------------------------------------------|---------------|---------------|------------------|-------------|-------------|-------------|------------------|--------------|--------------|
| <i>Bradyrhizobium</i> sp. USDA 3187            | 3046          | 6640          | 0.51             | 30          | 8           | 100         | 0.34             | 0.88         | 153          |
| <i>Bradyrhizobium</i> sp. 13562                | 2602          | 7000          | 0.37             | 15          | 17          | 100         | 0.23             | 0.79         | 42           |
| <i>Rhizobium</i> sp. USDA 3138                 | 2298          | 7000          | 0.33             | 15          | 14          | 100         | 0.22             | 0.75         | 29           |
| <i>Rhizobium leguminosarum</i> 13541           | 1936          | 7000          | 0.28             | 14          | 9           | 100         | 0.19             | 0.65         | 29           |
| <i>Rhizobium leguminosarum</i> 13544           | 1728          | 7000          | 0.25             | 5           | 21          | 100         | 0.16             | 0.60         | 13           |
| <i>Rhizobium leguminosarum</i> MM105           | 1601          | 7000          | 0.23             | 8           | 13          | 100         | 0.14             | 0.65         | 8            |
| <i>Pseudomonas fluorescence</i> DSM 50090T HAM | 1535          | 7000          | 0.22             | 9           | 12          | 100         | 0.15             | 0.61         | 7            |
| <i>Pseudomonas fluorescence</i> DSMZ 50091HAM  | 1484          | 7000          | 0.21             | 10          | 8           | 100         | 0.14             | 0.62         | 6            |
| <i>Shewanella putrefaciens</i> DSMZ 6067 HAM   | 912           | 6717          | 0.14             | 7           | 6           | 100         | 0.10             | 0.39         | 3            |

**Table S2**

| <b>Organism resemblance</b>                                 | <b>Act Sc</b> | <b>Max Sc</b> | <b>Rel Score</b> | <b>PN k</b> | <b>PN b</b> | <b>PN m</b> | <b>Rel P-Num</b> | <b>I-Cor</b> | <b>Score</b> |
|-------------------------------------------------------------|---------------|---------------|------------------|-------------|-------------|-------------|------------------|--------------|--------------|
| <i>Bradyrhizobium</i> sp. USDA 3187                         | 926           | 7000          | 0.13             | 7           | 4           | 100         | 0.09             | 0.47         | 6            |
| <i>Bradyrhizobium</i> sp. 13562                             | 904           | 6713          | 0.15             | 8           | 4           | 100         | 0.1              | 0.29         | 4            |
| <i>Rhizobium</i> sp. USDA 3138                              | 834           | 6852          | 0.12             | 6           | 5           | 100         | 0.09             | 0.35         | 4            |
| <i>Rhizobium leguminosarum</i> 13541                        | 813           | 7000          | 0.12             | 4           | 6           | 100         | 0.07             | 0.43         | 3            |
| <i>Rhizobium leguminosarum</i> 13544                        | 601           | 6007          | 0.1              | 4           | 5           | 100         | 0.07             | 0.34         | 2            |
| <i>Arachis</i> bacteria MM105                               | 786           | 6947          | 0.11             | 5           | 5           | 100         | 0.07             | 0.25         | 2            |
| <i>Pseudomonas fluorescence</i> DSM 50090THAM               | 746           | 6865          | 0.11             | 3           | 7           | 100         | 0.07             | 0.27         | 2            |
| <i>Shewanella putrefaciens</i> DSMZ 6067 HAM                | 606           | 7000          | 0.09             | 4           | 5           | 100         | 0.07             | 0.27         | 2            |
| <i>Staphylococcus simiae</i> DSM 17637                      | 679           | 6917          | 0.1              | 3           | 6           | 100         | 0.06             | 0.24         | 1            |
| <i>Staphylococcus captitis</i> ssp <i>captitis</i> DSM 6180 | 836           | 6650          | 0.13             | 6           | 5           | 100         | 0.09             | 0.13         | 1            |
